# Supplementary material for: Catalytic Transfer of Fructose to 5-Hydroxymethylfurfural over Bimetal Oxide Catalysts
Source: Hindawi journal article supplement (doi:10.1155/2019/3890298), 2019-04-01
Supplement: f1 [file 3890298.f1.doc]

**Supporting information**

**Catalytic transfer of fructose to 5-hydroxymethylfurfural over bi-metal oxide catalysts**

***Qiuyun Zhang*† 1,3*, Xiaofang Liu*† 2*, Tingting Yang* 1*, Quanlin Pu* 1*, Caiyan Yue*1*, Shuya Zhang*1*, and Yutao Zhang*1,3**

*1* School of Chemistry and Chemical Engineering, Anshun University, Anshun, 561000, Guizhou, China

*2* Food and Pharmaceutical Engineering Institute, Guiyang University, Guiyang 550005, Guizhou, China

*3* Engineering Technology Center of Control and Remediation of Soil Contamination of Provincial Science & Technology Bureau, Anshun University, Anshun, 561000, Guizhou, China

Correspondence should be addressed to Qiuyun Zhang; sci_qyzhang@126.com and Yutao Zhang; zyt0516@126.com

**†** Both authors contribute equally.


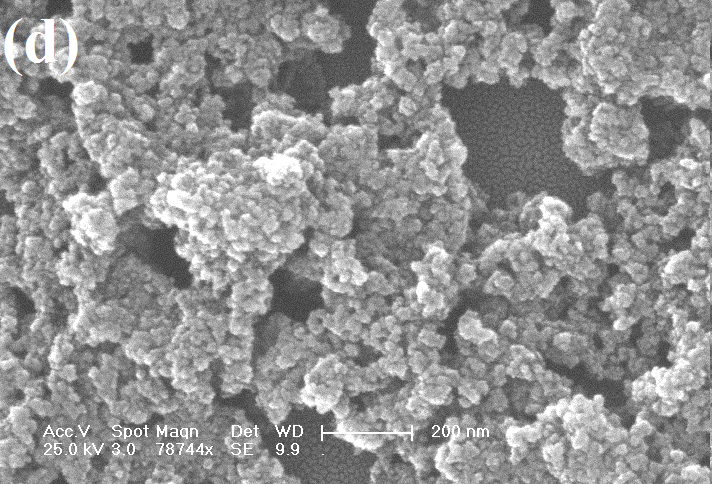


**Figure 1S:** Characterization of the S-AlMo sample. Powder XRD pattern (a), Nitrogen adsorption-desorption isotherm and pore size distribution curve (inset) (b), NH3-TPD profiles (c) and SEM images (d).

The structural properties and acidity of S-AlMo sample prepared were characterized by powder XRD, nitrogen adsorption-desorption, NH3-TPD and SEM (see Figure 1S). Powder XRD measurements showed the S-AlMo sample have Al2(MoO4)3 and crystalline MoO3 peaks[24, 25], and was closely related to active sites for dehydration reaction. Nitrogen adsorption-desorption analysis showed that the sample gave a type IV isotherms with type H2 hysteresis loop in the high pressure region, characteristic of materials with mesostructured, indicating that stearic acid modified aluminum-molybdenum mixed oxide catalyst could get the mesoporous structure, which was consistent with our previous work [13, 22, 23]. In addition, the Brunauer-Emmett-Teller (BET) surface area, pore volume, and average pore size were 49.82 m2g-1, 0.17 cm3g-1, and 14.19 nm, respectively. Compare with S-Al sample, the Brunauer-Emmett-Teller (BET) surface area, pore volume, and average pore size were 21.73 m2g-1, 0.03 cm3g-1, and 5.68 nm, respectively. Moreover, there were two desorption profiles (100-200ºC, around 750ºC) over the temperature range of 50-800ºC in the NH3-TPD profiles, suggesting the catalyst contains weak and strong acid sites on its surface, meanwhile, the acid concentration of S-AlMo sample (0.87 mmol/g) was higher than that of S-Al sample (0.78 mmol/g).SEM also allows to get insights about the morphological data of catalysts, and the images reveal that the aggregation of small particles in irregular shapes and formed a grainy structure.
